# Supplementary material
Source: MDPI journal article supplement (https://www.mdpi.com/2311-5637/8/10/496)
Supplement: s1 [file s1 › fermentation-1928254-supplementary.pdf]

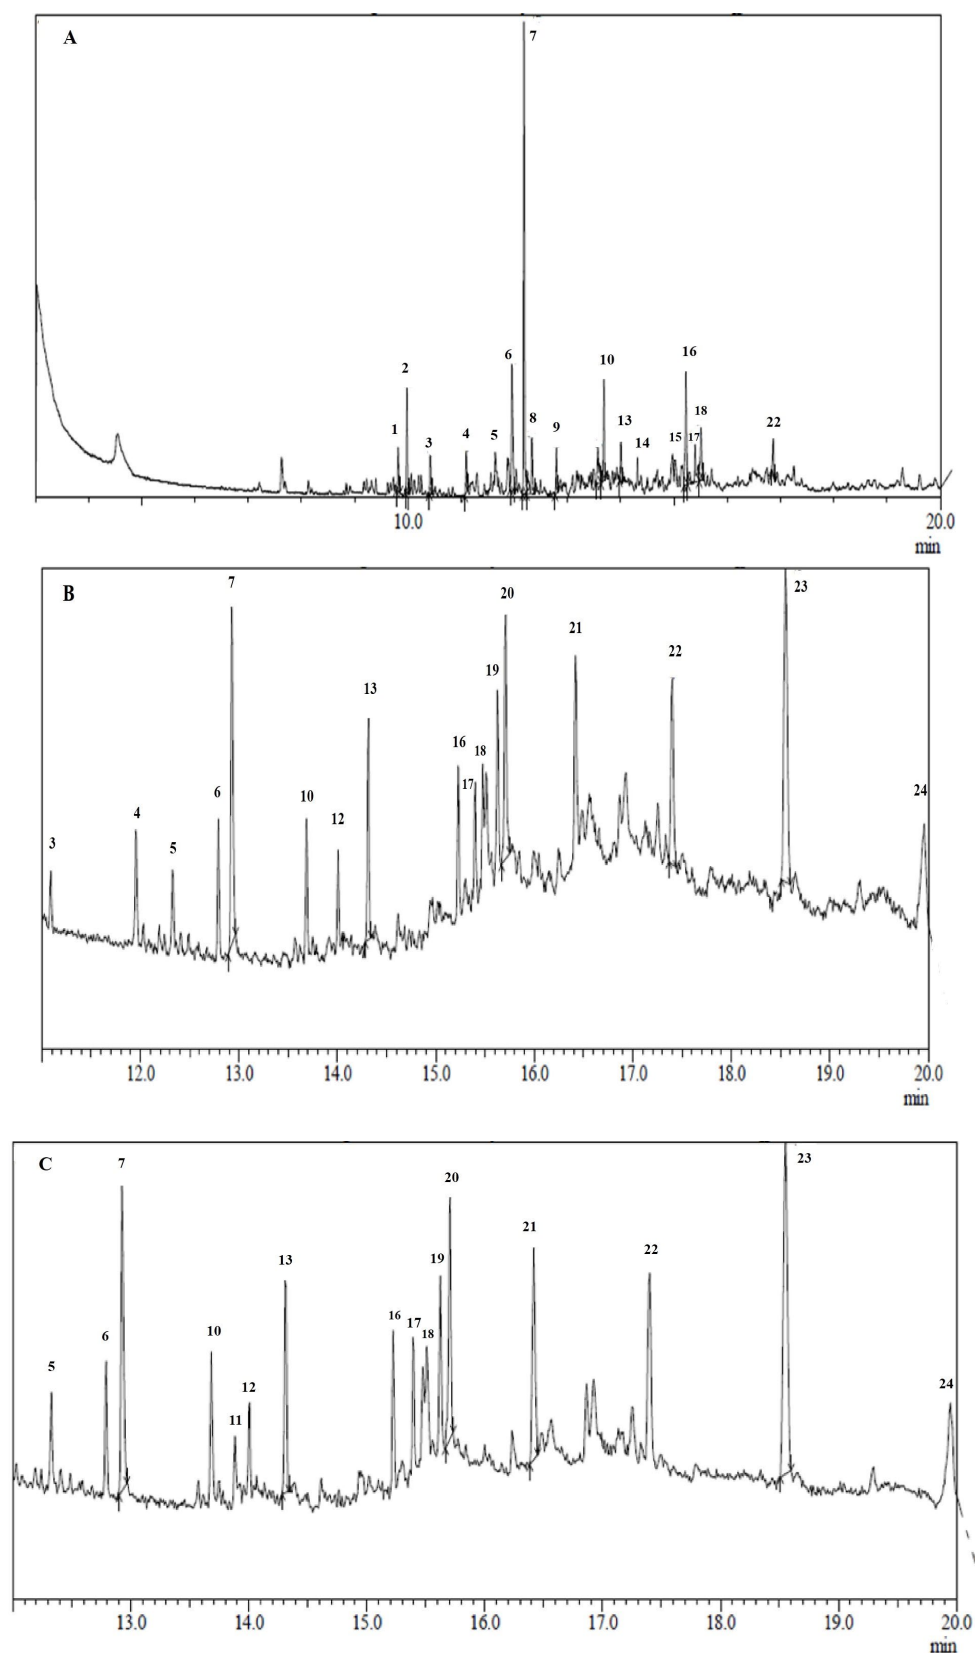

**Figure S1.** Volatile aroma compounds in control soft white cheese (CS) (A), soft white cheeses with free *Lc. paracasei* cells (CFL) (B) and freeze-dried symbiotic biocatalyst (CSB) (C) after ripening for 45 days.
